# Supplementary material for: Phytoplasma infection of a tropical root crop triggers bottom-up cascades by favoring generalist over specialist herbivores
Source: PLoS One. 2017 Aug 16;12(8):e0182766. doi: 10.1371/journal.pone.0182766 (PMC5559091; doi:10.1371/journal.pone.0182766)
Supplement: S1 Table — A supporting dataset for the manuscript, with per-plant mealybug, parasitoid and hyperparasitoid abundance records is held in a public data repository, accessible at the following URL: http://dx.doi.org/10.7910/DVN/OERIEZ. (XLSX) [file pone.0182766.s001.xlsx]

## Sheet: Sheet1
CWB YY	CWB YN	CWB NN									parasitoids
Sample ID	Site	Field	Plant	CWB	CMB	PMB	PJB	FV	MM	TOTAL MB	ALF	ALM	AP	PW1	PW2	PW3	PW4	PW5	PW6	PW7	PW8	PW9	PW10	PW	UW	TOT pot. paras.	Paras richns	Sample ID
1.1.1	1	1	1	1	0	0	6	0	0	6	0	0	0	0	0	0	0	0	0	0	0	0	0	0	0	0		1.1.1
1.1.2	1	1	2	1	0	0	16	0	0	16	0	0	0	0	0	0	0	0	0	0	0	0	0	0	0	0		1.1.2
1.1.3	1	1	3	1	0	0	3	0	0	3	0	0	0	0	0	0	0	0	0	0	0	0	0	0	0	0		1.1.3
1.1.4	1	1	4	1	0	0	5	0	0	5	0	0	0	0	0	0	1	0	0	0	0	0	0	0	1	2	2	1.1.4
1.1.5bis	1	1	5	0	8	0	3	0	0	11	2	1	0	1	0	0	0	0	0	0	0	0	0	1	0	5	4	1.1.5bis
1.1.6	1	1	6	0	0	0	50	0	0	50	0	0	0	0	0	0	0	0	0	0	0	0	0	0	0	0		1.1.6
1.1.7	1	1	7	0	0	0	7	0	0	7	0	0	0	2	0	0	0	0	0	0	0	0	0	1	0	3	2	1.1.7
1.1.8	1	1	8	0	14	0	10	0	0	24	1	1	0	0	0	0	0	0	0	0	0	0	0	0	0	2	1	1.1.8
1.2.1B	1	2	1	0	0	0	6	0	0	6	0	0	0	0	0	0	0	0	0	0	0	0	0	0	0	0		1.2.1B
1.2.2B	1	2	2	0	2	8	0	0	0	10	1	1	0	1	0	0	0	0	0	0	0	0	0	2	0	5	3	1.2.2B
1.2.3B	1	2	3	0	0	0	7	0	0	7	0	0	0	0	0	0	0	0	0	0	0	0	0	2	0	2	1	1.2.3B
1.2.4B	1	2	4	0	0	0	18	0	8	18	0	0	0	2	4	0	1	2	0	0	0	0	0	5	3	17	6	1.2.4B
2.1.1	2	1	1	1	0	28	45	10	0	83	1	2	0	3	0	3	3	0	0	0	0	0	1	6	0	19	6	2.1.1
2.1.2	2	1	2	1	0	30	35	0	0	65	0	1	0	0	1	0	4	0	0	0	0	0	0	1	0	7	4	2.1.2
2.1.3	2	1	3	1	10	4	0	0	0	14	0	1	0	2	0	0	0	0	0	0	0	0	0	0	0	3	2	2.1.3
2.1.4	2	1	4	1	3	25	5	10	0	43	1	2	0	4	0	0	2	1	0	0	0	0	0	13	1	24	4	2.1.4
2.1.5	2	1	5	0	35	20	0	0	2	55	13	11	0	4	0	1	1	0	0	0	1	0	0	0	3	34	6	2.1.5
2.1.6	2	1	6	0	30	0	0	0	0	30	11	16	0	8	0	2	0	0	0	0	0	0	0	1	0	38	4	2.1.6
2.1.7	2	1	7	0	300	20	10	0	1	330	13	18	1	1	0	6	3	0	0	0	1	0	0	0	0	43	6	2.1.7
2.1.8	2	1	8	0	700	0	10	0	0	710	17	14	1	4	0	6	0	0	0	0	3	0	0	0	4	49	5	2.1.8
2.2.1	2	2	1	0	35	0	0	0	0	35	2	2	0	0	0	0	0	0	0	0	0	0	0	0	0	4	1	2.2.1
2.2.2	2	2	2	0	31	0	0	0	0	31	8	8	0	0	0	0	0	0	0	0	0	0	0	0	5	21	2	2.2.2
2.2.3	2	2	3	0	20	0	0	0	0	20	7	5	2	5	0	0	0	0	0	0	0	0	0	0	19	38	4	2.2.3
2.2.4	2	2	4	0	100	0	0	0	0	100	3	2	0	1	0	0	0	0	0	0	0	0	0	0	2	8	3	2.2.4
3.1.1	3	1	1	1	0	21	6	0	0	27	0	0	10	0	2	0	4	0	0	0	0	0	0	4	0	20	4	3.1.1
3.1.2	3	1	2	1	0	58	25	10	3	93	0	0	15	0	0	0	5	0	0	0	0	0	0	2	0	22	3	3.1.2
3.1.3	3	1	3	1	0	60	8	0	20	68	0	0	73	14	0	10	22	0	0	2	0	1	0	30	0	152	7	3.1.3
3.1.4	3	1	4	1	0	20	0	46	24	66	0	0	13	0	2	2	3	11	24	0	0	0	0	4	0	59	7	3.1.4
3.1.5	3	1	5	0	0	11	6	0	0	17	1	1	0	0	0	0	0	0	0	0	0	0	0	1	0	3	2	3.1.5
3.1.6	3	1	6	0	0	12	0	0	0	12	1	2	1	0	0	0	0	0	0	0	0	0	0	1	0	5	3	3.1.6
3.1.7	3	1	7	0	0	6	11	0	0	17	1	1	0	2	1	0	1	0	0	0	0	0	0	3	0	9	5	3.1.7
3.1.8	3	1	8	0	0	15	0	0	0	15	3	0	0	1	1	0	0	0	0	0	0	0	0	0	0	5	3	3.1.8
3.2.1	3	2	1	0	0	8	22	0	0	30	0	0	0	2	0	0	0	0	0	0	0	0	0	1	0	3	2	3.2.1
3.2.2	3	2	2	0	0	22	0	0	0	22	1	3	0	0	0	0	0	0	0	0	0	1	0	0	0	5	2	3.2.2
3.2.3	3	2	3	0	0	10	0	0	0	10	0	0	0	0	0	0	0	0	0	0	0	0	0	0	0	0	0	3.2.3
3.2.4	3	2	4	0	180	0	0	0	0	180	44	35	0	15	0	0	0	0	0	0	13	0	0	30	0	137	4	3.2.4
4.1.1	4	1	1	1	10	10	12	0	0	32	8	7	0	0	0	0	0	0	0	0	0	0	0	0	0	15	1	4.1.1
4.1.2	4	1	2	1	39	0	0	0	0	39	10	7	0	0	0	0	0	0	0	0	0	0	0	0	0	17	1	4.1.2
4.1.3	4	1	3	1	0	800	0	0	0	800	0	0	3	0	0	0	8	0	0	0	0	0	0	5	0	16	3	4.1.3
4.1.4	4	1	4	1	7	55	0	0	13	62	0	0	0	0	0	0	1	0	0	0	0	0	0	1	0	2	2	4.1.4
4.1.5	4	1	5	0	130	0	0	0	0	130	12	10	0	0	0	0	0	0	0	0	0	0	0	0	0	22	1	4.1.5
4.1.6	4	1	6	0	15	5	0	0	0	20	0	0	0	0	0	0	0	0	0	0	0	0	0	0	0	0		4.1.6
4.1.7	4	1	7	0	19	1	0	0	0	20	0	0	0	0	0	0	0	0	0	0	0	0	0	0	0	0		4.1.7
4.1.8	4	1	8	0	60	0	0	0	0	60	4	5	0	0	0	0	0	0	0	0	0	0	0	0	0	9	1	4.1.8
4.2.1	4	2	1	0	40	0	7	0	0	47	13	18	0	0	0	0	0	0	0	0	0	0	0	0	0	31	1	4.2.1
4.2.2	4	2	2	0	15	0	0	0	0	15	2	0	0	0	0	0	0	0	0	0	0	0	0	0	0	2	1	4.2.2
4.2.3	4	2	3	0	100	0	3	0	0	103	1	4	0	0	0	0	0	0	0	0	0	0	0	0	0	5	1	4.2.3
4.2.4	4	2	4	0	150	0	0	0	0	150	12	41	0	3	0	0	0	0	0	0	0	0	0	6	0	62	3	4.2.4
total					2053	1249	336	76	71	3714	193	219	119	75	11	30	59	14	24	2	18	2	1	120	38	925	12+
